# Supplementary material for: The effect of two endogenous retinoids on the mRNA expression profile in human primary keratinocytes, focusing on genes causing autosomal recessive congenital ichthyosis
Source: PubMed Central journal article supplement (PMC4168020; doi:10.1007/s00403-014-1476-4), 2014-06-13
Supplement: 403_2014_1476_MOESM1_ESM.pdf [file 403_2014_1476_MOESM1_ESM.pdf]

“The effect of two endogenous retinoids on the mRNA expression profile in human primary keratinocytes, focusing on genes causing autosomal recessive congenital ichthyosis”

Archives of Dermatological Research

H. Törmä, A. Bergström, G. Ghiasifarahani, B. Berne

Uppsala University, Sweden. e-mail:hans.torma@medsci.uu.se

## Online Resource 2

Top ten induced and suppressed genes in response to differentiation.

| Induced  | Fold change | p-value  |  | Suppressed | Fold change | p-value  |
|----------|-------------|----------|--|------------|-------------|----------|
| MUC15    | 7,275       | 3,38E-21 |  | ANXA6      | -4,837      | 1,08E-23 |
| DAPL1    | 6,955       | 9,06E-18 |  | EMP3       | -4,654      | 4,04E-20 |
| KRT1     | 6,744       | 5,26E-21 |  | ADAMTS1    | -4,468      | 6,27E-23 |
| DSC1     | 6,413       | 3,38E-21 |  | MIG7       | -4,133      | 2,96E-09 |
| ZNF750   | 6,246       | 1,31E-19 |  | MT1L       | -3,973      | 1,35E-13 |
| C10orf99 | 6,074       | 2,19E-21 |  | HS3ST2     | -3,964      | 5,26E-21 |
| THEM5    | 6,067       | 3,40E-19 |  | VIM        | -3,932      | 9,95E-23 |
| SERPINB4 | 5,995       | 4,01E-15 |  | RPSAP52    | -3,914      | 3,54E-14 |
| KRTDAP   | 5,937       | 3,23E-21 |  | PTHLH      | -3,904      | 1,77E-24 |
| SBSN     | 5,920       | 6,68E-27 |  | POSTN      | -3,899      | 8,24E-21 |

“The effect of two endogenous retinoids on the mRNA expression profile in human primary keratinocytes, focusing on genes causing autosomal recessive congenital ichthyosis”

Archives of Dermatological Research

H. Törmä, A. Bergström, G. Ghiasifarahani, B. Berne

Uppsala University, Sweden. e-mail:hans.torma@medsci.uu.se

### Online resource 3.

Functional annotation of regulated genes (differentiating versus proliferating cells) was performed using the Database for Annotation, Visualization and Integrated Discovery (DAVID) with the most significant P-value listed. For a complete list of all the clusters with a P-value less than  $10^{-4}$ , see Supplemental Table 2. Genes showing a 1.5-fold change was included.

| <b>Clusters induced</b>                                | <b>#</b> | <b>p-value</b> |
|--------------------------------------------------------|----------|----------------|
| epidermis development                                  | 35       | 5.72E-20       |
| plasma membrane part                                   | 87       | 7.87E-5        |
| cellular lipid metabolic process                       | 32       | 2.62E-5        |
|                                                        |          |                |
| <b>Clusters suppressed</b>                             |          |                |
| regulation of cell proliferation                       | 56       | 6.59E-9        |
| blood vessel development                               | 24       | 1.87E-6        |
| DNA metabolic process                                  | 52       | 4.03E-14       |
| regulation of DNA metabolic process                    | 14       | 4.54E-5        |
|                                                        |          |                |
| <b>Clusters (all upregulated and suppressed genes)</b> |          |                |
| epidermis development                                  | 42       | 2.73E-14       |
| regulation of cell proliferation                       | 82       | 1.32E-7        |
| cell-cell junction                                     | 31       | 1.84E-7        |
| endoplasmic reticulum                                  | 86       | 9.16E-6        |
| regulation of cell differentiation                     | 55       | 2.77E-6        |
| DNA replication                                        | 31       | 2.74E-7        |
|                                                        |          |                |

#The number of genes in each category.

“The effect of two endogenous retinoids on the mRNA expression profile in human primary keratinocytes, focusing on genes causing autosomal recessive congenital ichthyosis”

Archives of Dermatological Research

H. Törmä, A. Bergström, G. Ghiasifarahani, B. Berne

Uppsala University, Sweden. e-mail:hans.torma@medsci.uu.se

### Online Resource 5

The top ten induced and suppressed genes in response to atRA-exposure in differentiated keratinocytes. Cultured keratinocytes were differentiated for four days by omitting rhEGF and adding 1.2 mM calcium chloride to the culture medium for four days. Retinoic acid (1  $\mu$ M) was added for 24h.

| Induced | Fold change | Adjusted p-value |  | Suppressed | Fold change | Adjusted p-value |
|---------|-------------|------------------|--|------------|-------------|------------------|
| CEACAM6 | 5,22        | 4,13E-12         |  | C10orf99   | -5,40       | 2,01E-19         |
| IL1B    | 4,92        | 2,24E-26         |  | CASP14     | -4,66       | 2,30E-18         |
| PAPPA   | 4,77        | 5,29E-19         |  | THEM5      | -4,60       | 1,61E-15         |
| KLK6    | 4,40        | 1,17E-21         |  | KRT2       | -4,60       | 1,93E-16         |
| BHLHE41 | 4,30        | 2,01E-19         |  | DAPL1      | -4,57       | 7,41E-13         |
| STRA6   | 4,17        | 3,47E-16         |  | METTL7A    | -4,04       | 2,29E-15         |
| BMP6    | 4,09        | 2,92E-17         |  | AADA2L2    | -3,77       | 8,20E-13         |
| TCN1    | 4,08        | 8,96E-18         |  | ANKRD35    | -3,68       | 1,26E-13         |
| RHCG    | 4,07        | 1,67E-18         |  | CLEC2A     | -3,66       | 3,83E-14         |
| CALB2   | 4,01        | 4,77E-12         |  | ACER1      | -3,62       | 2,41E-15         |

“The effect of two endogenous retinoids on the mRNA expression profile in human primary keratinocytes, focusing on genes causing autosomal recessive congenital ichthyosis”

Archives of Dermatological Research

H. Törmä, A. Bergström, G. Ghiasifarahani, B. Berne

Uppsala University, Sweden. e-mail:hans.torma@medsci.uu.se

### Online Resource 6

Functional annotation of regulated genes (atRA- versus vehicle-treated cells) in differentiating keratinocytes to biological processes was performed using the Database for Annotation, Visualization and Integrated Discovery (DAVID) with the most significant P-value listed. Genes showing a 1.5-fold change was included.

| <b>Clusters induced</b>                       | <b>#</b> | <b>p-value</b> |
|-----------------------------------------------|----------|----------------|
| tissue development                            | 16       | 8.82E-5        |
| hormone metabolic process                     | 7        | 1.53E-4        |
|                                               |          |                |
| <b>Clusters suppressed</b>                    |          |                |
| lipid catabolic process                       | 10       | 1.49E-6        |
| vesicular fraction                            | 8        | 6.72E-4        |
|                                               |          |                |
| <b>Clusters (up-regulated and suppressed)</b> |          |                |
| plasma membrane                               | 80       | 7.56E-5        |
| endoplasmic reticulum                         | 30       | 9.88E-5        |
| cell-cell junction                            | 12       | 6.62E-5        |
| endopeptidase activity                        | 16       | 3.61E-4        |
| intermediate filament                         | 11       | 2.28E-4        |
|                                               |          |                |

# The number of genes in each category.
